# Supplementary material
Source: MDPI journal article supplement (https://www.mdpi.com/1999-4907/13/3/391)
Supplement: s1 [file s1]

Archive with 2 entries (2 files):
- forests-1597959 R2 supplemental material.pdf
- databases and documentation.zip
